# Supplementary material for: Efficacy and Safety of CD28- or 4-1BB-Based CD19 CAR-T Cells in B Cell Acute Lymphoblastic Leukemia
Source: PubMed Central journal article supplement — Mol Ther Oncolytics. 2020 Jun 24;18:272–81. doi: 10.1016/j.omto.2020.06.016 (PMC7378699; doi:10.1016/j.omto.2020.06.016), 2020-06-24
Supplement: mmc1.pdf [file mmc1.pdf]

**OMTO, Volume 18**

## **Supplemental Information**

**Efficacy and Safety of CD28- or 4-1BB-Based**

**CD19 CAR-T Cells in B Cell**

**Acute Lymphoblastic Leukemia**

**Xiangyu Zhao, Junfang Yang, Xian Zhang, Xin-An Lu, Min Xiong, Jianping Zhang, Xiaosu Zhou, Feifei Qi, Ting He, Yanping Ding, Xuelian Hu, Floris De Smet, Peihua Lu, and Xiaojun Huang**

## Supplementary Information

**Table S1. Statistical analysis of the bioluminescent intensity at the tumor region of mice treated with CD28 CAR-T (28z) or 4-1BB CAR-T (bbz) at the dose of  $1 \times 10^6$  cells/mouse.**

|        | Saline   |          | bbz                     |          | 28z                    |          |
|--------|----------|----------|-------------------------|----------|------------------------|----------|
|        | Mean     | SD       | Mean                    | SD       | Mean                   | SD       |
| Day 0  | 7.01E+03 | 1.15E+03 | 7.67E+03                | 1.21E+03 | 7.47E+03               | 4.11E+03 |
| Day 5  | 8.53E+04 | 4.56E+04 | 8.04E+04                | 1.37E+04 | 7.60E+03               | 4.23E+03 |
| Day 7  | 1.93E+04 | 9.60E+04 | 4.97E+03 <sup>##*</sup> | 1.61E+03 | 2.49E+04 <sup>##</sup> | 1.41E+04 |
| Day 14 | 1.69E+06 | 1.19E+06 | 1.26E+03 <sup>##*</sup> | 5.12E+02 | 1.54E+05 <sup>#</sup>  | 8.23E+04 |
| Day 17 | 1.15E+07 | 6.84E+06 | 8.02E+03 <sup>##*</sup> | 3.07E+03 | 1.51E+06 <sup>#</sup>  | 1.20E+06 |
| Day 21 | 3.16E+07 | 5.42E+06 | 3.24E+03 <sup>##*</sup> | 2.69E+03 | 9.99E+06 <sup>#</sup>  | 9.30E+06 |

#,  $P < 0.05$  compared with saline group; ##,  $P < 0.01$  compared with saline group; \*,  $P < 0.05$  compared with 28z group.

**Table S2. Characteristics of patients infused with CD28- or 4-1BB-based CAR-T cells**

| Characteristics             | No. (%) of patients |        |
|-----------------------------|---------------------|--------|
|                             | 28z                 | bbz    |
| <b>Gender</b>               |                     |        |
| Male                        | 11(61)              | 11(61) |
| Female                      | 7(39)               | 7(39)  |
| <b>Age, year</b>            |                     |        |
| 0-13                        | 12(67)              | 10(56) |
| ≥14                         | 6(33)               | 8(44)  |
| <b>Disease status</b>       |                     |        |
| Relapsed after HSCT         | 5(28)               | 2(12)  |
| Relapsed after chemotherapy | 12(67)              | 15(83) |
| Primary refractory          | 1(5)                | 1(5)   |
| <b>Complex karyotypes</b>   |                     |        |
| Yes                         | 10(56)              | 9(50)  |
| No                          | 5(28)               | 8(44)  |
| Unknown                     | 3(16)               | 1(6)   |
| <b>BCR-ABL fusion gene</b>  |                     |        |
| Yes                         | 12(66)              | 6(33)  |
| No                          | 3(17)               | 12(67) |
| Unknown                     | 3(17)               | 0(0)   |
| <b>Tumor burden</b>         |                     |        |
| <70%                        | 12(67)              | 16(89) |
| ≥70%                        | 6(33)               | 2(11)  |

**Table S3. The percentage of B cells in the peripheral blood of patients treated with CD28 CAR-T or 4-1BB CAR-T cells.**

|     | Patient No. | Baseline | D4   | D7   | D10  | D14  | D21  |
|-----|-------------|----------|------|------|------|------|------|
| 28z | A01         | NA       | 1.05 | BMDL | BMDL | BMDL | BMDL |
|     | A02         | 1.48     | 0.06 | 0.46 | NA   | BMDL | BMDL |
|     | A03         | 19.09    | 24.8 | 20.2 | 1.22 | 0.13 | BMDL |
|     | A04         | 0.02     | 0.20 | 0.61 | 0.43 | NA   | BMDL |
|     | A05         | BMDL     | BMDL | BMDL | NA   | BMDL | BMDL |
|     | A06         | NA       | BMDL | 0.96 | NA   | BMDL | BMDL |
|     | A07         | 3.27     | 1.03 | BMDL | NA   | 0.02 | NA   |
|     | A10         | 5.96     | 3.67 | 4.06 | 0.18 | BMDL | BMDL |
| bbz | B01         | BMDL     | 1.10 | 2.08 | NA   | 0.01 | BMDL |
|     | B02         | 4.20     | 0.05 | NA   | BMDL | BMDL | BMDL |
|     | B03         | NA       | BMDL | BMDL | NA   | BMDL | NA   |
|     | B04         | 0.41     | 0.14 | 0.2  | NA   | NA   | BMDL |
|     | B05         | NA       | BMDL | BMDL | NA   | NA   | NA   |
|     | B06         | NA       | BMDL | BMDL | NA   | NA   | NA   |
|     | B07         | 0.67     | BMDL | BMDL | NA   | NA   | NA   |
|     | B08         | 1.98     | 33.5 | 37.1 | BMDL | NA   | NA   |

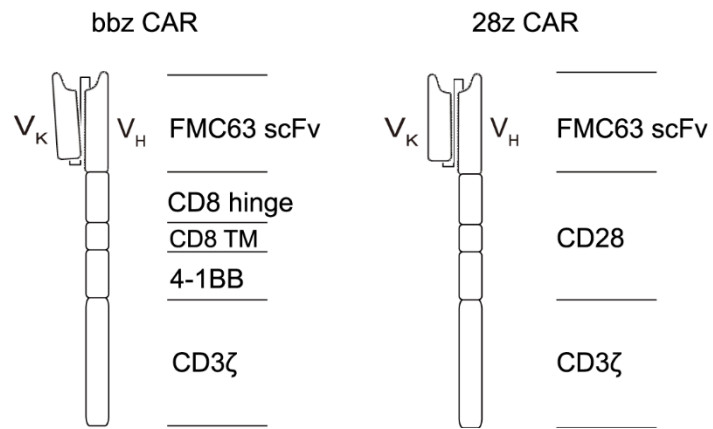

**Figure S1. Schematic illustration of 4-1BB CAR (bbz CAR) and CD28 CAR (28z CAR) compositions.**

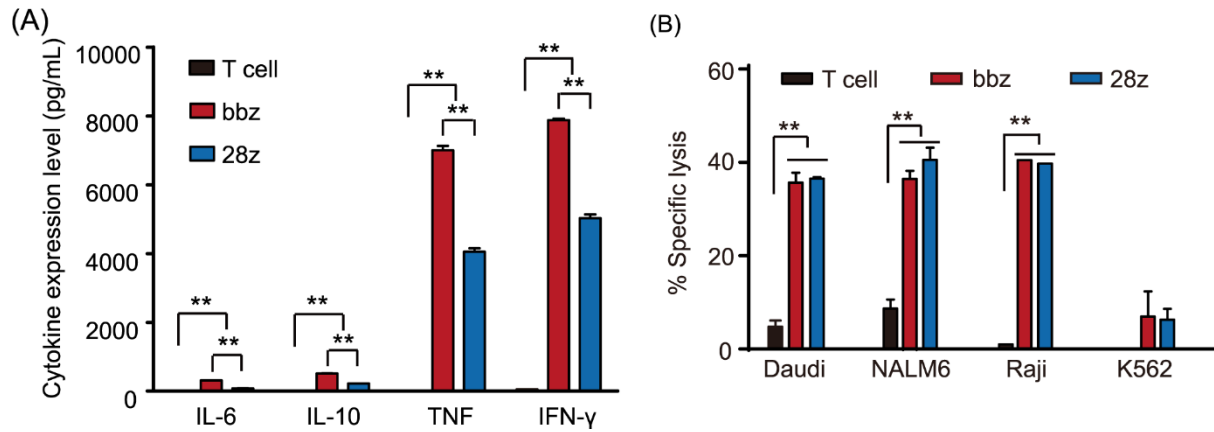

**Figure S2. The activation and killing efficiency of CD28- and 4-1BB-based CAR-T cells *in vitro*.** (A) The expression level of cytokines after CAR-T cells or T cells were co-cultured with Daudi cells. \*\*,  $P < 0.01$ . (B) The killing efficiency of CAR-T cells when co-cultured with indicated target cells at the E: T ratio of 5:1. Tumor cells including Daudi, NALM6, Raji, and K562 cells that were incubated with T cells with the equivalent number of CAR-T cell group served as controls. \*\*,  $P < 0.01$ . 28z, CD28 CAR-T cell; bbz, 4-1BB CAR-T cell.

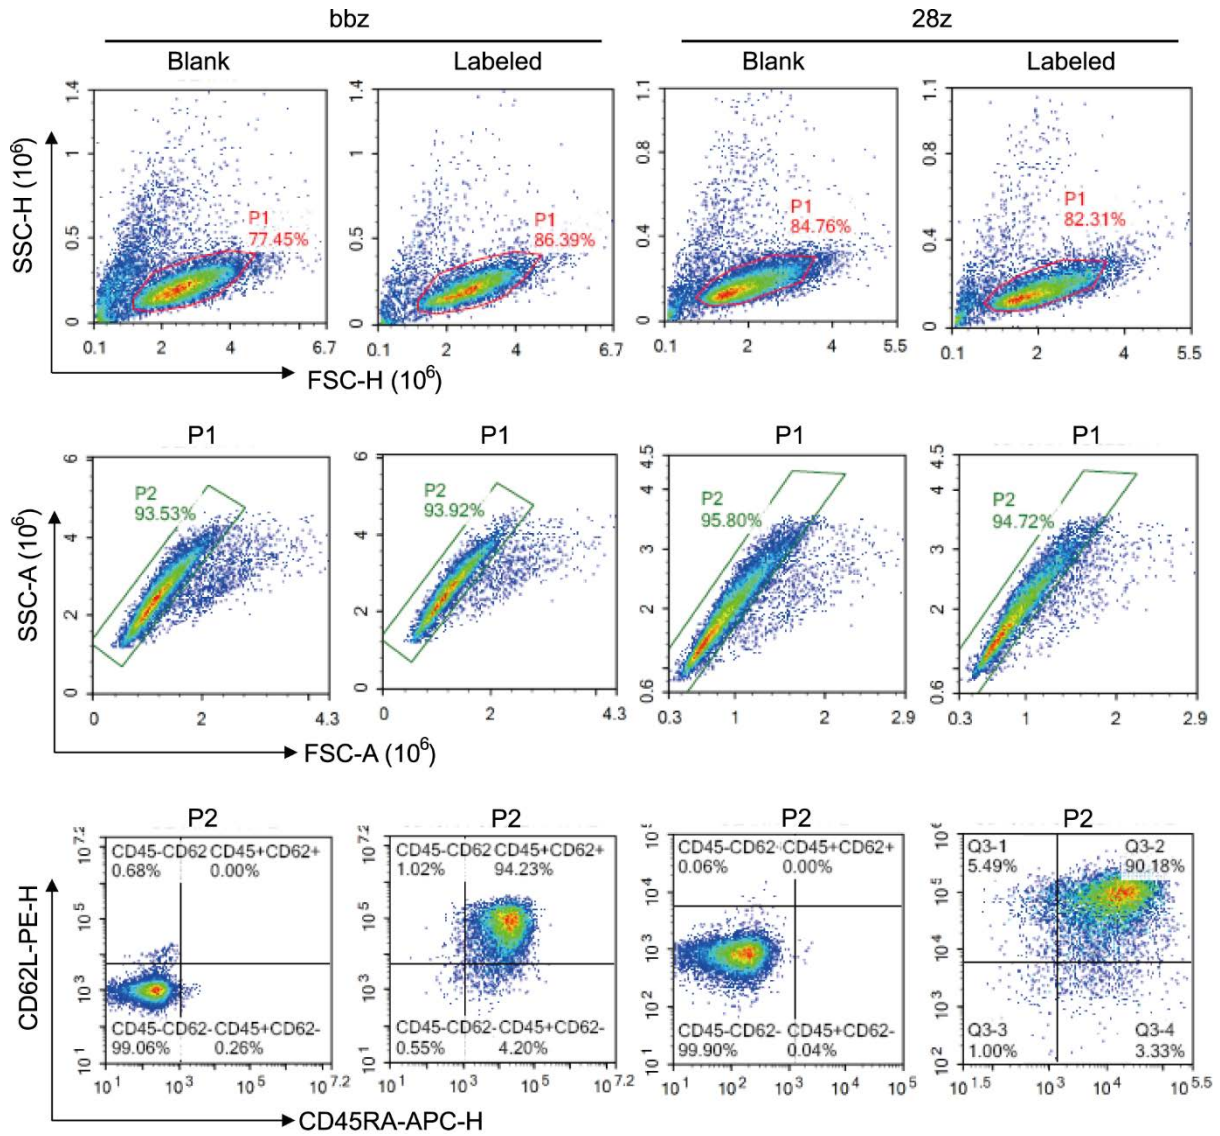

**Figure S3. Representative FACS plots of 4-1BB CAR-T (bbz) or CD28 CAR-T (28z) cells that were stained with CD45RA-APC and CD62L-PE antibodies. Blank, cells without antibody labeling; labeled, cells that were labeled with CD45RA-APC and CD62L-PE antibodies.**

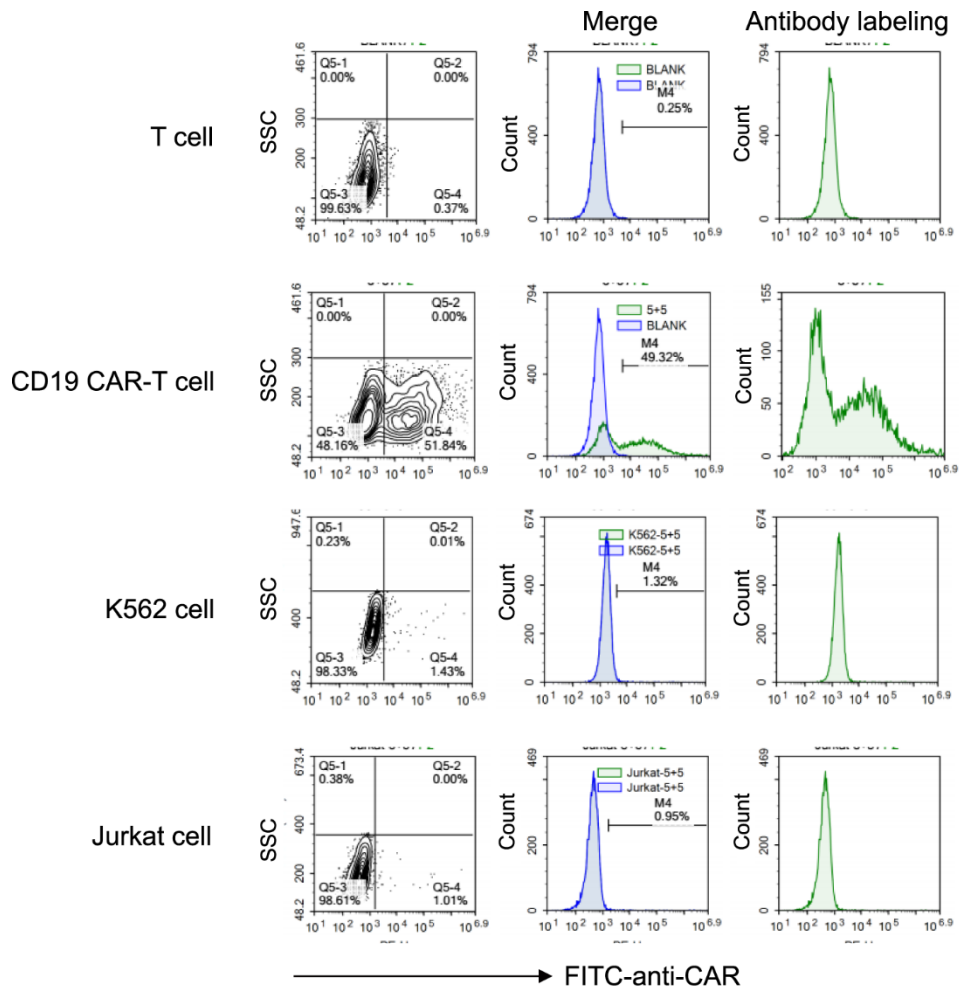

**Figure S4. FACS plots showing the specificity of FITC-anti-CAR.** The FITC-anti-CAR antibody was incubated with T cell, CD19-specific CAR-T cell, K562 cell, or Jurkat cell, and fluorescence intensity was analyzed using flow cytometry. Only CD19 CAR-T cell showed FITC positive signal. Merge means the merged FACS plots of cells with (green) or without (blue) antibody incubation.
